# Supplementary material for: Network Architecture and Mutational Sensitivity of the C. elegans Metabolome
Source: Front Mol Biosci. 2018 Jul 31;5:69. doi: 10.3389/fmolb.2018.00069 (PMC6079199; doi:10.3389/fmolb.2018.00069)
Supplement: Supplementary Table 1 — Network and mutational parameters of metabolites. [file Table_1.XLSX]

## Sheet: Metabolite_netstats
Traitnum	Metabolite_KEGG	BET	CLO	DEG	INDEG	OUTDEG	CORE	deltaM	abs_deltaM	h2m	Vm	IM	IE
1	L-Serine	0.0345823	0.0573128	0.0170807	5	6	2	-0.00136	0.00136	0.00068008	0.747298	9.87e-05	0.0723431
2	Glycine	0.0266104	0.0443771	0.0170807	5	6	2	0.000489	0.000489	0.00115846	1.2133	0.000392729	0.423562
3	Nicotinamide	0.00220965	0.0461216	0.00621118	2	2	2	0.02287	0.02287	0.00817592	0.947881	0.000863229	4.97227
4	Succinate	0.0221499	0.0510671	0.0108696	4	3	2	0.04518	0.04518	0.00252119	6.4331	0.000778489	52.9329
5	Uracil	0.0783032	0.0443648	0.0108696	4	3	2	-0.0003	0.0003	0.00114975	0.00934356	0.00012269	0.0921225
6	Fumarate	0.0283168	0.0537841	0.00776398	3	2	2	-0.00091	0.00091	0.000895017	0.0700928	0.000108611	0.0770682
7	L-Methionine	7.49e-05	0.00496894	0.00776398	2	3	2	-0.00131502	0.00131502	0.00289377	0.202414	0.000196658	0.0315389
8	Alanine	0	0	0.0015528	1	0	1	0.000437	0.000437	0.0003506	0.0109546	0.000277914	0.994308
9	L-Aspartate	0.0550542	0.0567562	0.0124224	3	5	2	-0.00199	0.00199	0.00165602	0.0964501	0.000260132	0.0422891
10	3-Aminoisobutyric acid	0	0	0.0015528	1	0	1	-0.0011	0.0011	8.11e-05	0.0071611	3.43e-05	0.238214
11	trans-4-Hydroxy-L-proline	0.0044821	0.00276052	0.00465839	2	1	1	-0.00144	0.00144	0.000649701	2.11598	9.45e-05	0.0684562
12	(S)-Malate	0.0290165	0.0574459	0.00776398	2	3	2	0.002425	0.002425	0.000727127	0.795533	0.000157109	0.589266
13	5-Oxoproline	0	0.0453868	0.0015528	0	1	1	-0.00104	0.00104	0.000299899	14.5511	5.24e-05	0.105949
14	L-Glutamate	0.0366593	0.0482829	0.0201863	5	8	2	-0.00076	0.00076	0.00073129	1.94606	0.000213788	0.203798
15	L-Phenylalanine	0.00113743	0.0402789	0.00931677	1	5	1	0.000322	0.000322	0.000362721	1.35771	0.000154609	0.502549
16	L-Asparagine	0.00223622	0.0525789	0.00465839	1	2	1	-0.00273951	0.00273951	8.3e-05	0.000213068	0.000134838	0.171441
17	D-Ribose	0	0.0443458	0.0015528	0	1	1	0.005078	0.005078	0.00246947	0.152591	0.000840779	2.10987
18	Putrescine	0.00336157	0.00279503	0.00310559	1	1	1	-0.00088	0.00088	8.7e-05	0.141871	4.15e-05	0.3075
19	Citrate	0.171567	0.0585764	0.0124224	4	4	2	-0.00156	0.00156	0.000536762	0.00911673	0.00018189	0.152427
20	Adenine	0.00333501	0.0322047	0.00931677	2	4	2	0.00067	0.00067	0.00109668	0.0307963	0.000178207	0.218331
21	Protein lysine	0	0.00465839	0.00465839	0	3	1	-0.00104	0.00104	0.000219476	0.00885778	0.000320296	0.842616
22	L-Tyrosine	0.00451832	0.0415467	0.0124224	3	5	2	-0.00144	0.00144	0.0006254	0.39442	0.000170234	0.115276
23	Pantothenate	0	0.0015528	0.0015528	0	1	1	-0.00148223	0.00148223	0.00166738	0.025601	0.000122924	0.0305705
24	Xanthine	0.00439274	0.0310027	0.0108696	3	4	2	0.06641	0.06641	0.00481999	0.0730227	0.00171076	107.686
25	Palmitoyl-CoA	0.0661616	0.019529	0.0108696	2	5	2	-0.00026	0.00026	0.00151799	13.4259	0.000193567	0.119268
26	Urate	0	0.0297022	0.00310559	1	1	1	-0.00178	0.00178	0.00204822	0.0905869	0.000654492	0.105473
27	L-Tryptophan	0	0.00496894	0.00465839	0	3	1	-0.00057	0.00057	0.000834471	0.411299	4.93e-05	0.0430794
28	Adenosine	0.00551568	0.0321983	0.00931677	4	2	2	0.0439	0.0439	0.00485338	0.815484	0.00126139	41.0226
29	alpha,alpha-Trehalose	0	0.0421792	0.0015528	0	1	1	0.001858	0.001858	0.000932593	4237.61	0.000584196	1.38663
